# The American Journal of Psychiatry

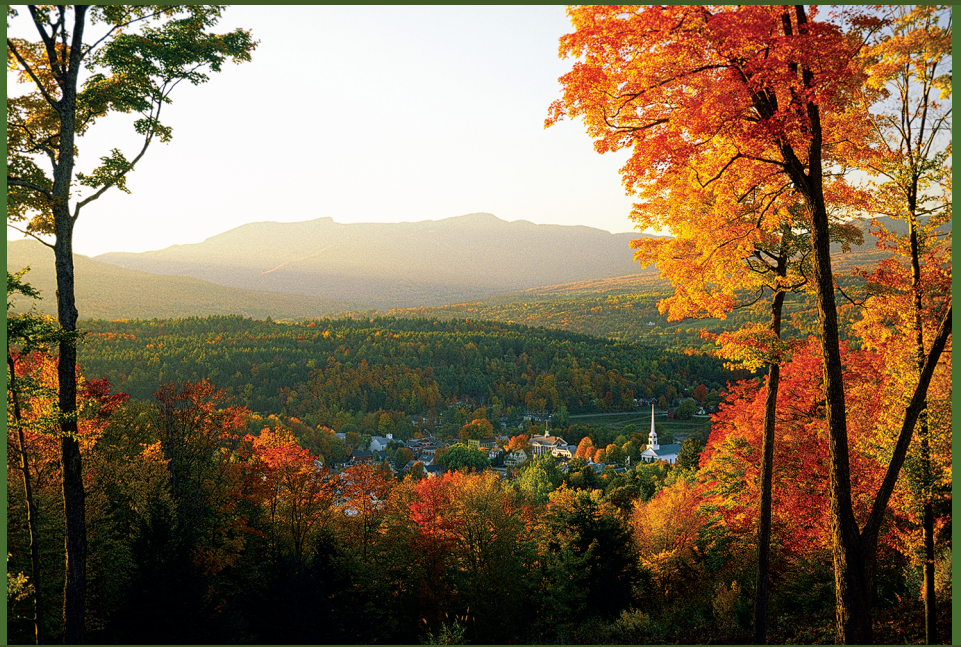

Randomized Trial of Cognitive-Behavioral Therapy Versus  
Light Therapy for Seasonal Affective Disorder

Clinical Approach to the Differential Diagnosis Between Behavioral Variant  
Frontotemporal Dementia and Primary Psychiatric Disorders

A New Perspective on the Pathophysiology of Borderline  
Personality Disorder: A Model of the Role of Oxytocin

Neural Correlates of Error Processing in Young People  
With a History of Severe Childhood Abuse
