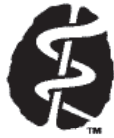

## Officers 2015–2016

### President

Renée L. Binder, M.D.

### President-Elect

Maria A. Oquendo, M.D.

### Treasurer

Frank W. Brown, M.D.

### Secretary

Altha J. Stewart, M.D.

### Assembly

#### Speaker

Glenn A. Martin, M.D.

#### Speaker-Elect

Daniel J. Anzia, M.D.

#### Recorder

Theresa Miskimen, M.D.

### Office of the CEO and Medical Director

#### CEO and Medical Director

Saul Levin, M.D., M.P.A.

### Board of Trustees

Jeffrey Akaka, M.D.

Lama Bazzi, M.D.

R. Scott Benson, M.D.

Ronald M. Burd, M.D.

Stella Cai, M.D.

Brian Crowley, M.D.

Anita S. Everett, M.D.

Jeffrey L. Geller, M.D., M.P.H.

Dilip V. Jeste, M.D.

Jeffrey A. Lieberman, M.D.

Vivian B. Pender, M.D.

Gail E. Robinson, M.D.

Ravi N. Shah, M.D.

Paul Summergrad, M.D.

Melinda Young, M.D.

## Editorial Board

### Editor

Robert Freedman, M.D.

### Deputy Editors

David A. Lewis, M.D.

Robert Michels, M.D.

Daniel S. Pine, M.D.

A. John Rush, M.D.

Susan K. Schultz, M.D.

Carol A. Tamminga, M.D.

### Associate Editors

Alan Brown, M.D., M.P.H.

Tyrone Cannon, Ph.D.

Benjamin G. Druss, M.D., M.P.H.

Graham J. Emslie, M.D.

Daniel C. Javitt, M.D.

Bankole Johnson, M.D.

Ellen Leibenluft, M.D.

Joan L. Luby, M.D.

Constantine G. Lyketsos, M.D., M.H.S.

Helen S. Mayberg, M.D., F.R.C.P.C.

Barbara Milrod, M.D.

Terrie E. Moffitt, Ph.D.

Anita Thapar, M.B.B.Ch., F.R.C.Psych.,

Ph.D., F.Med.Sci.

Mauricio Tohen, M.D., Dr.PH., M.B.A.

Eduard Vieta, M.D., Ph.D.

Katherine L. Wisner, M.D., M.S.

Xin Yu, M.D.

### Editor Emerita

Nancy C. Andreasen, M.D., Ph.D.

### Former Editors

Amariah Brigham, M.D., 1844–1849

T. Romeyn Beck, M.D., 1849–1854

John P. Gray, M.D., 1854–1886

G. Alder Blumer, M.D., 1886–1894

Richard Dewey, M.D., 1894–1897

Henry M. Hurd, M.D., 1897–1904

Edward N. Brush, M.D., 1904–1931

Clarence B. Farrar, M.D., 1931–1965

Francis J. Braceland, M.D., 1965–1978

John C. Nemiah, M.D., 1978–1993

### Editorial Staff

#### Executive Editor

Michael D. Roy

#### Senior Editors

John J. Guardiano, Ph.D.

Jane Weaver

#### Production Manager

Susan Westrate

#### Assistant Editor

Angela Moore

#### Online Content Manager

Michael Pogachar

#### Editorial Support Services Manager

Heidi Koch

#### Editorial Assistant

Linda LaCour

#### Assistants to the Editors

Lois Lilienthal

Laura English

Rachel Hogg

Russell A. Scholl

### Publisher

Rebecca D. Rinehart

# The Residents' JOURNAL

## The American Journal of Psychiatry Residents' Journal

August 2015

Volume 10

Issue 8

### Inside

- 2 **Biological Psychiatry**  
Adarsh S. Reddy, M.D., Ph.D.
- 3 **Traumatic Brain Injury and Juvenile Criminal Behavior**  
Matthew E. Hirschtritt, M.D., M.P.H.
- 6 **Neurobiology of Consciousness: Relevance and Application in Psychiatry**  
Gopalkumar Rakesh, M.D.
- 10 **White Matter Dysfunction Central to Neurodevelopment of Schizophrenia: A Review of Emerging Literature**  
Amy E. Curtis, M.D.
- 13 **A Brief Introduction to Resting State Functional Connectivity**  
Alecia Vogel-Hammen, M.D., Ph.D.
- 16 **Optogenetic Applications in Psychiatric Research**  
Julio M. Bernardi, M.D.
- 19 **Brain on Fire: My Month of Madness**  
Reviewed by Janet Charoensook, M.D.
- 20 **Residents' Resources**

### IN THIS ISSUE

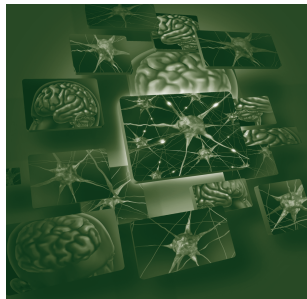

This issue of the *Residents' Journal* focuses on the topic of **Biological Psychiatry**. In an editorial, Adarsh S. Reddy, M.D., Ph.D., discusses the importance of understanding the biological underpinnings of psychiatric illnesses. Matthew E. Hirschtritt, M.D., M.P.H., examines evidence for and against a causal mechanism linking traumatic brain injury (TBI) and criminality in youths, with discussion on the neurobiology of TBI. Gopalkumar Rakesh, M.D., investigates the neurobiology of consciousness and its relevance and application in psychiatry. Amy E. Curtis, M.D., presents a review of white matter dysfunction central to the neurodevelopment of schizophrenia. Alecia Vogel-Hammen, M.D., Ph.D., provides important information on resting state functional connectivity. Julio M. Bernardi, M.D., examines optogenetic applications in psychiatric research. Lastly, Janet Charoensook, M.D., presents a review of the book *Brain on Fire: Month of Madness*, about a rare neuro-immunological illness that manifested with prominent psychosis.

**Editor-in-Chief**  
Rajiv Radhakrishnan, M.B.B.S., M.D.

**Senior Deputy Editor**  
Katherine Pier, M.D.

**Deputy Editor**  
Hun Millard, M.D., M.A.

**Guest Section Editor**  
Adarsh S. Reddy, M.D., Ph.D.

**Associate Editors**  
Rafik Sidaros, M.B.B.Ch.  
Janet Charoensook, M.D.

**Staff Editor**  
Angela Moore

**Editors Emeriti**  
Sarah B. Johnson, M.D.  
Molly McVoy, M.D.  
Joseph M. Cerimele, M.D.  
Sarah M. Fayad, M.D.  
Monifa Seawell, M.D.  
Misty Richards, M.D., M.S.

### Editor-in-Chief

Rajiv Radhakrishnan, M.B.B.S., M.D.

### Senior Deputy Editor

Katherine Pier, M.D.

### Deputy Editor

Hun Millard, M.D., M.A.

### Associate Editors

Rafik Sidaros, M.B.B.Ch.  
Janet Charoensook, M.D.

*The Residents' Journal* accepts manuscripts authored by medical students, resident physicians, and fellows. To submit your paper, please visit the manuscript submission site at [mc.manuscriptcentral.com/appi-ajp](http://mc.manuscriptcentral.com/appi-ajp) and either create an account or use your existing account. For manuscript type, select "Residents." Then follow the instructions to upload your manuscript. Residents who are interested in participating as Guest Section Editors should e-mail *The Residents' Journal* Editor-in-Chief Rajiv Radhakrishnan at [rajiv.radhakrishnan@yale.edu](mailto:rajiv.radhakrishnan@yale.edu).

*The Residents' Journal* is sent free-of-charge to all psychiatry residents. Anyone interested in being included on the distribution list should contact Angela Moore, *The Residents' Journal* staff editor at [ajp@psych.org](mailto:ajp@psych.org) with "Subscribe to Residents' Journal" in the subject line.

To access the complete Residents' Journal archives, visit [ajp.psychiatryonline.org/residents\\_journal](http://ajp.psychiatryonline.org/residents_journal)

# THE AMERICAN PSYCHIATRIC ASSOCIATION

1000 Wilson Blvd., Suite 1825, Arlington, VA 22209-3901  
(888) 357-7924 (toll-free inside the U.S. and Canada) / (703) 907-7300  
web site: [www.psychiatry.org](http://www.psychiatry.org) • e-mail: [apa@psych.org](mailto:apa@psych.org)

## Chairpersons of Councils, Committees, and Task Forces

### Standing Committees

|                             |                                |
|-----------------------------|--------------------------------|
| <b>Bylaws</b>               | Rebecca W. Brendel, M.D., J.D. |
| <b>Elections</b>            | Barry K. Herman, M.D.          |
| <b>Ethics</b>               | Ezra Griffith, M.D.            |
| <b>Finance and Budget</b>   | Alan F. Schatzberg, M.D.       |
| <i>Audit</i>                | Frank W. Brown, M.D.           |
| <i>Investment Oversight</i> | David Fassler, M.D.            |
| <b>Joint Reference</b>      | Maria A. Oquendo, M.D.         |
| <b>Membership</b>           | Rahn K. Bailey, M.D.           |
| <b>Nominating</b>           | Paul Summergrad, M.D.          |
| <b>Tellers</b>              | Catherine May, M.D.            |

### Councils

#### **Council on Addiction Psychiatry**

Frances R. Levin, M.D.

#### **Council on Advocacy and Government Relations**

Barry B. Perlman, M.D.

##### *Advocacy and Litigation Funding*

Jeffrey Akaka, M.D.

##### *Caucus of State Hospital Psychiatrists*

##### *Caucus of VA Psychiatrists*

#### **Council on Children, Adolescents, and Their Families**

Joseph V. Penn, M.D.

##### *Agnes Purcell McGavin Award*

Robert Lee Hendren, M.D.

##### *Blanche F. Ittleson Research Award*

##### *Caucus of Psychiatrists Treating Persons With*

###### *Intellectual Disabilities*

Michael Houston, M.D.

##### *College Mental Health Caucus*

#### **Council on Communications**

Arshya Vahabzadeh, M.D.

#### **Council on Geriatric Psychiatry**

Robert P. Roca, M.D.

#### **Council on Healthcare Systems and Financing**

Harsh K. Trivedi, M.D.

##### *Reimbursement for Psychiatric Care*

Bruce J. Schwartz, M.D.

##### *RBRVS, Codes and Reimbursement*

Gregory G. Harris, M.D.

#### **Council on International Psychiatry**

Michelle Riba, M.D.

##### *Caucus on Global Mental Health and Psychiatry*

#### **Council on Medical Education and Lifelong Learning**

Richard F. Summers, M.D.

##### *APA Public Psychiatry Fellowship Selection Committee*

Derri Shtasel, M.D.

##### *APA/SAMHSA Minority Fellowship Selection and Advisory*

Roberto Lewis-Fernandez, M.D.

##### *Caucus on MOC Issues*

##### *Caucus of Resident-Fellow Members*

##### *Scientific Program*

Steven Koh, M.D.

##### *Scientific Program Committee of the Institute on*

###### *Psychiatric Services*

Mary E. Diamond, M.D.

##### *Subcommittee on Joint Sponsorship of Continuing*

###### *Medical Education (CME)*

##### *Vestermark Award Committee*

Jonathan F. Borus, M.D.

#### **Council on Minority Mental Health and Health Disparities**

Christina V. Mangurian, M.D.

##### *Caucus of Rural Psychiatrists*

##### *Caucus on Religion, Spirituality and Psychiatry*

#### **Council on Psychiatry And Law**

Steven K. Hoge, M.D.

##### *Caucus of Correctional Psychiatrists*

##### *Isaac Ray/Human Rights Award*

Liza Hannah Gold, M.D.

##### *Judicial Action*

Marvin Stanley, M.D.

##### *Manfred S. Guttmacher Award*

David A. Lowenthal, M.D.

#### **Council on Psychosomatic Medicine**

##### **(Consultation Liaison Psychiatry)**

David F. Gitlin, M.D.

#### **Council on Quality Care**

Grayson Norquist, M.D.

##### *Mental Health Information Technology*

Steven Roy Daviss, M.D.

##### *Steering Committee on Practice Guidelines*

Michael J. Vergare, M.D.

#### **Council on Research**

Dwight L. Evans, M.D.

##### *Caucus of Psychiatrists Treating Persons with Eating Disorders*

##### *Caucus on Alternative and Complementary Medicine*

##### *Psychiatric Dimensions of Disasters*

Robert J. Ursano, M.D.

##### *Research Awards*

Matthew W. State, M.D.

##### *Task Force to Revise the Practice of Electroconvulsive Therapy*

# There's So Much More to AJP Than Meets the Page!

Visit *The American Journal of Psychiatry's* website on PsychiatryOnline for the following features!

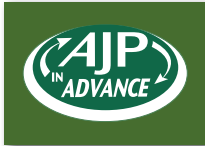

## AJP in Advance

The very latest research advances!

At **AJP in Advance**, you can discover the following before their appearance in print:

### **Is Adult ADHD a Childhood-Onset Neurodevelopmental Disorder? Evidence From a Four-Decade Longitudinal Cohort Study**

Childhood and adult cases of ADHD showed almost no overlap in a population cohort followed for four decades. Neurocognitive impairments differed between age groups, and adult cases did not share the polygenic risk of child ADHD.

### **A Randomized, Double-Blind, Placebo-Controlled Trial of Citicoline for Cocaine Dependence in Bipolar I Disorder**

Urine drug screens demonstrated that citicoline, a dietary supplement in the U.S., reduced cocaine use more than placebo when added to treatment for cocaine-dependent patients with bipolar I disorder. Citicoline's advantage appeared quickly but declined over 12 weeks.

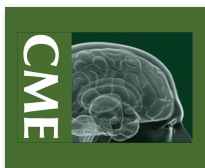

## AJP CME

Three articles in this issue form the basis of a short course with questions that can be answered for up to 1 *AMA PRA Category 1 Credit™* each by visiting <http://psychiatryonline.org/cme> and clicking on the "**American Journal of Psychiatry**" tab. CME credit is issued only **online**, and a paid subscription to AJP CME course program is required. This month's courses appear on pages 925–928.

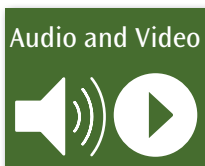

Audio and Video

## Have You Heard?

With AJP Audio you can listen to highlights of this issue. This month, Deputy Editor Susan K. Schultz, M.D., discusses differential diagnosis of frontotemporal dementia, autoimmune encephalitis in postpartum psychosis, the role of oxytocin in borderline personality disorder, neural correlates of error processing in young people exposed to severe childhood abuse, light therapy versus cognitive-behavioral therapy for seasonal affective disorder, and cognitive enhancement treatment for people with mental illness who do not respond to supported employment.

Also, visit the online edition of this month's Journal to view a video of Deputy Editor Daniel S. Pine, M.D., presenting highlights from the issue.

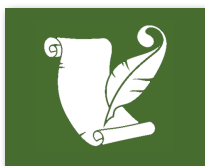

## Revisit the field's rich history!

### **75 years ago this month: "Psychometric Performance of Children Receiving Amphetamine (Benedrine) Sulfate"**

The authors found no significant differences in performance on intelligence and psychomotor testing in children assessed after a dose of amphetamine and again without amphetamine. Given that their sample was well accustomed to psychometric testing, and in light of findings from previous studies, the authors conclude that "when [intellectual] performance is improved following the administration of the drug, the result is accomplished primarily by an improved emotional attitude of the subject toward his intellectual task."

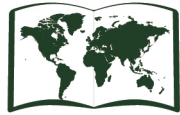

# SHARP

Shanghai Archives of Psychiatry · Since 1959

上 海 精 神 医 学

[WWW.SHANGHAIARCHIVESOFPSYCHIATRY.ORG](http://WWW.SHANGHAIARCHIVESOFPSYCHIATRY.ORG)

JUNE 2015 • VOL. 27 • NO. 3

## IN THIS ISSUE

<http://dx.doi.org/10.11919/j.issn.1002-0829.215069>

## COMMENTARIES

### Bridging the gap between research into biological and psychosocial models of psychosis

*Robin M MURRAY, Lucia SIDELI, Caterina LA CASCIA, Daniele LA BARBERA*

<http://dx.doi.org/10.11919/j.issn.1002-0829.215067>

### Addressing risk of bias in trials of cognitive behavioral therapy

*Katherine S. BUTTON, Marcus R. MUNAFÒ*

<http://dx.doi.org/10.11919/j.issn.1002-0829.215042>

## SYSTEMATIC REVIEW AND META-ANALYSIS

### Metacognitive training for schizophrenia: a systematic review

*Jiangling JIANG, Li ZHANG, Zhipei ZHU, Wei LI, Chunbo LI*

<http://dx.doi.org/10.11919/j.issn.1002-0829.215065>

## ORIGINAL RESEARCH ARTICLES

### Abnormal inter- and intra-hemispheric integration in male paranoid schizophrenia: a graph-theoretical analysis

*Jianhuai CHEN, Zhijian YAO, Jiaolong QIN, Rui YAN, Lingling HUA, Qing LU*

<http://dx.doi.org/10.11919/j.issn.1002-0829.215036>

### Controlled trial of the effectiveness of community rehabilitation for patients with schizophrenia in Shanghai, China

*Ying ZHOU, Rongshan ZHOU, Wenjie LI, Yiqiang LIN, Jian YAO, Jian CHEN, Tao SHEN*

<http://dx.doi.org/10.11919/j.issn.1002-0829.215026>

### Comparisons of family environment between homeless and non-homeless individuals with schizophrenia in Xiangtan, Hunan

*Jinliang CHEN, Jindong CHEN, Shuchun LI, Jun LIU, Guohua OUYANG, Wenxuan LUO, Xiaofeng GUO, Ting LI, Kaijie LI, Zhenkuo LI, Gan WANG*

<http://dx.doi.org/10.11919/j.issn.1002-0829.214162>

## CASE REPORT

### Oligodendroglioma presenting as chronic mania

*Rahul SAHA, Kiran JAKHAR*

<http://dx.doi.org/10.11919/j.issn.1002-0829.215039>

## RESEARCH METHODS IN PSYCHIATRY

### Development of a checklist of short-term and long-term psychological symptoms associated with ketamine use

*Ni FAN, Ke XU, Yuping NING, Daping WANG, Xiaoyin KE, Yi DING, Bin SUN, Chao ZHOU, Xuefeng DENG, Robert ROSENHECK, Hongbo HE*

<http://dx.doi.org/10.11919/j.issn.1002-0829.214158>

## BIostatISTICS IN PSYCHIATRY (27)

### Meta-analysis for psychiatric research using free software R

*Ding-Geng CHEN*

<http://dx.doi.org/10.11919/j.issn.1002-0829.215063>
